# Supplementary material for: Alternating donor–acceptor indigo-cyclopentadithiophene copolymers: competition between excited state conformational relaxation, energy transfer and excited state proton transfer
Source: Royal Society of Chemistry journal article supplement (doi:10.1039/c7qm00439g), 2017-11-30
Supplement: c7qm00439g1.pdf [file c7qm00439g1.pdf]

# Alternating Donor-Acceptor Indigo-Cyclopentadithiophene Copolymers: Competition between Excited State Conformational Relaxation, Energy Transfer and Excited State Proton Transfer

João Pina<sup>1)</sup>, Mohamed Alnady<sup>1)</sup>, Anika Eckert<sup>2)</sup>, Ulli Scherf<sup>2)</sup> and J. Sérgio Seixas de Melo<sup>1)\*</sup>

<sup>1)</sup> CQC, Department of Chemistry, University of Coimbra, P3004-535 Coimbra, Portugal

<sup>2)</sup> Bergische Universität Wuppertal, Macromolecular Chemistry Group (buwmakro) and Institute for Polymer Technology, Gauss-Str. 20, D-42097, Wuppertal, Germany

Email: sseixas@ci.uc.pt

## Supporting information

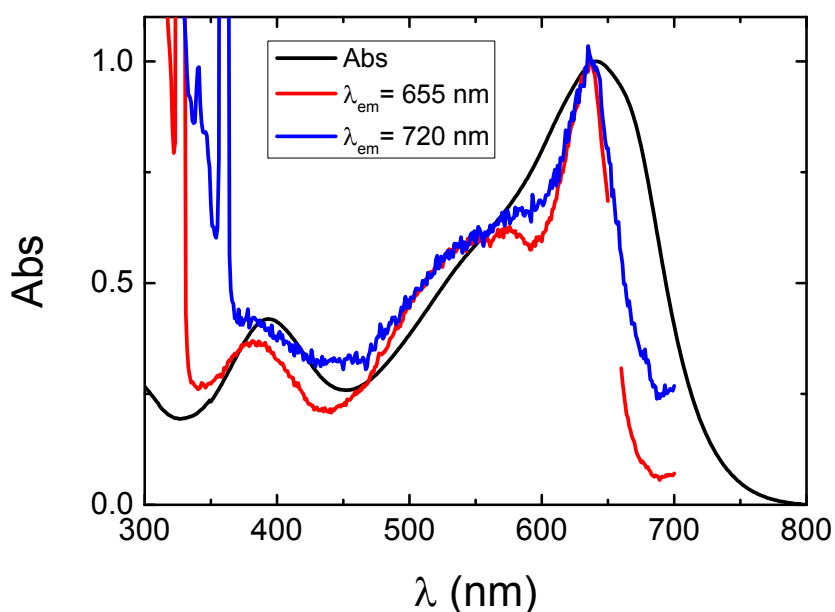

Figure S1– Normalized absorption and fluorescence excitation spectra for the copolymer (IndC<sub>12</sub>CPDT) in toluene solution at 293 K.

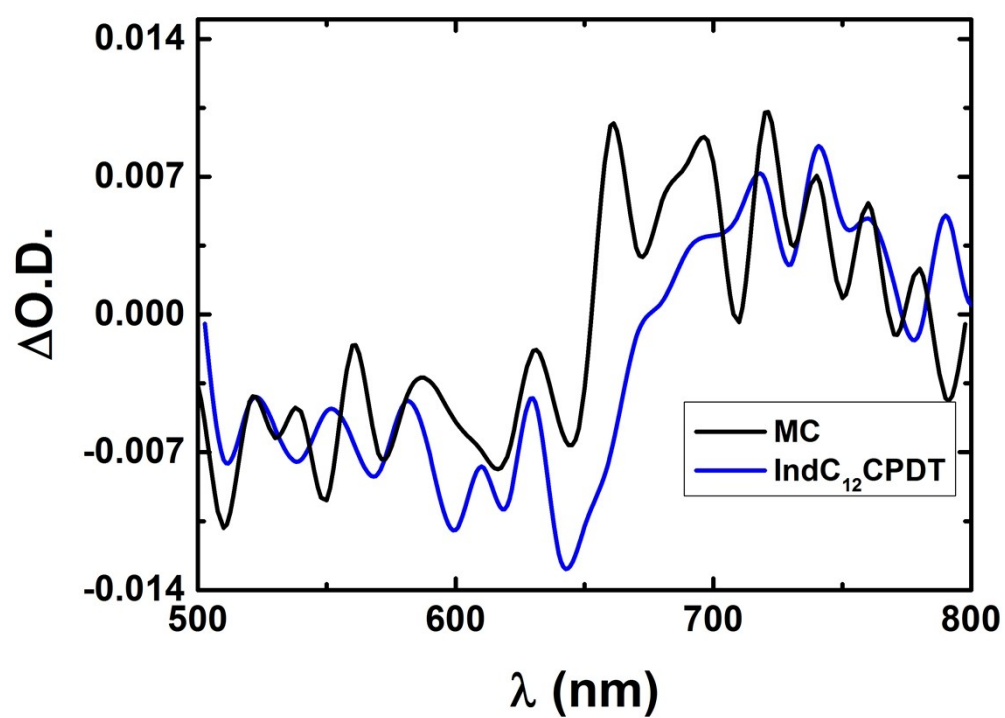

Figure S2- Normalized transient singlet-triplet difference absorption spectra for the oligomeric model compound (MC) and copolymer (IndC<sub>12</sub>CPDT) in degassed toluene solutions at T= 293 K.

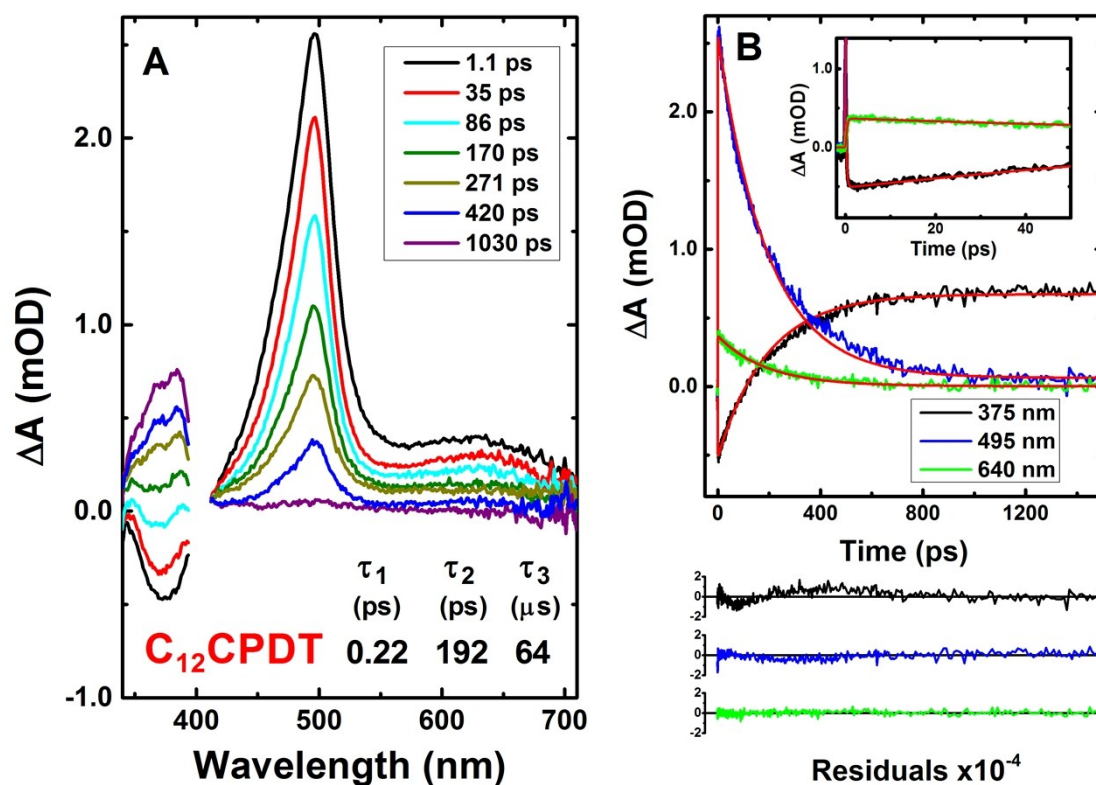

Figure S3- A) Time-resolved transient absorption data and lifetimes for C<sub>12</sub>CPDT obtained with  $\lambda_{\text{exc}} = 310$  nm in aerated dioxane solution at room temperature; together with (B) the representative kinetic traces with fits from the global analysis of the transient absorption data. For a better judgment of the quality of the fits the residuals are also presented.

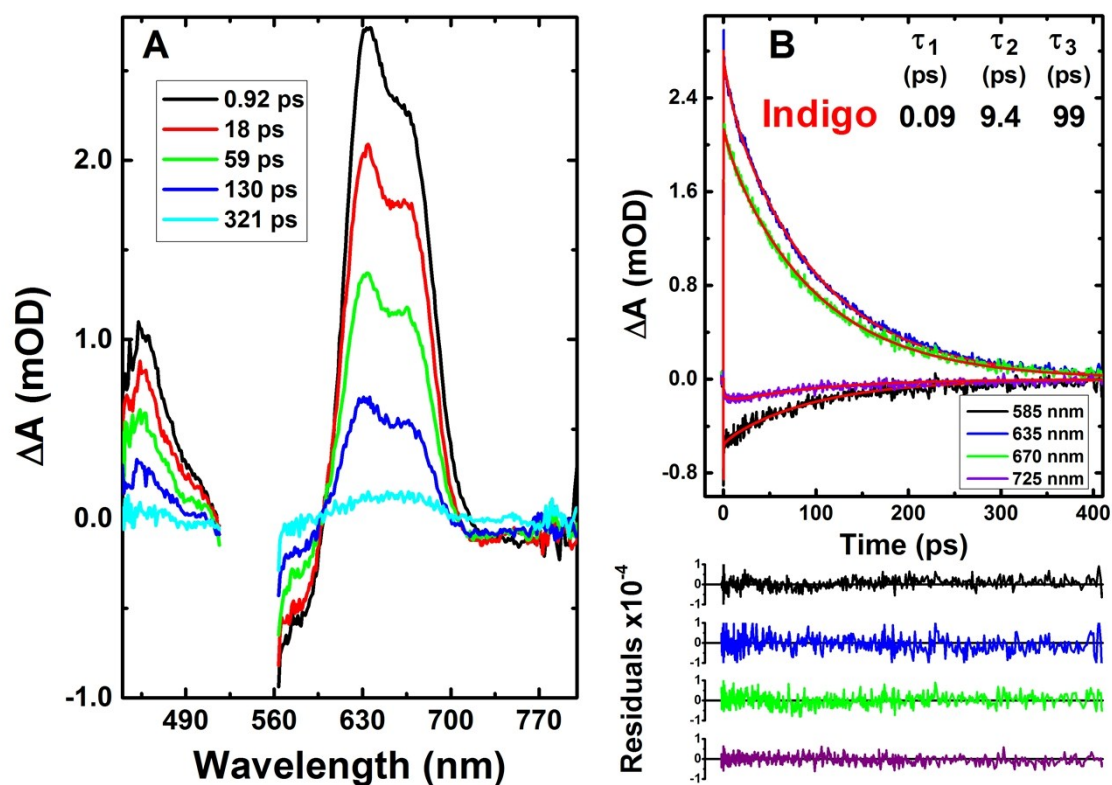

Figure S4- A) Time-resolved transient absorption data for Indigo obtained with  $\lambda_{\text{exc}} = 550$  nm in aerated 2MeTHF solution at room temperature; together with (B) the representative kinetic traces with fits and lifetimes from the global analysis of the transient absorption data. For a better judgment of the quality of the fits the residuals are also presented.

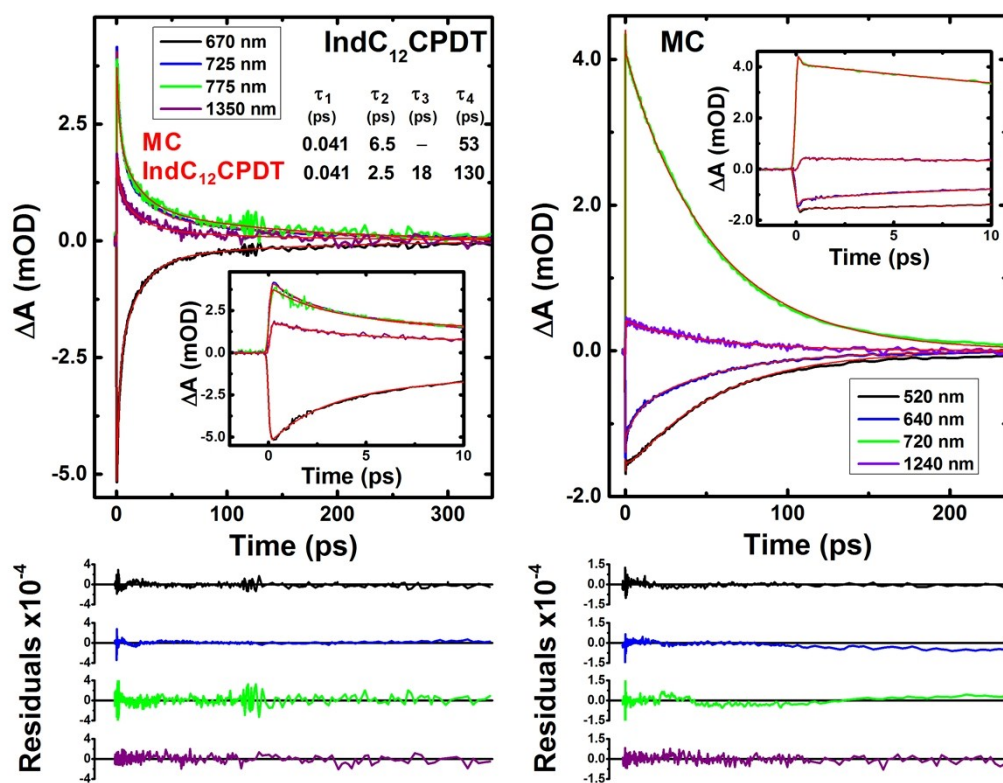

Figure S5- Representative kinetic traces with fits and results (lifetimes,  $\tau_i$ ) from the global analysis of the transient absorption data for IndC<sub>12</sub>CPDT and the model compound (MC) collected in toluene solution with  $\lambda_{\text{exc}} = 600$  nm. Also shown as inset are the decays at shorter times. For a better judgment of the quality of the fits the residuals are also presented.
